# Supplementary material for: Oral Health Service Utilization Behavior among Older Adults: Development and Validation of a Composite Behavioral Model-Based Questionnaire
Source: Research Square preprint supplement (doi:10.21203/rs.3.rs-6875885/v1), 2025-10-09
Supplement: Supplementary file 1 [file 0e00dbc92156cc17125ff145.docx]

​**Supplementary Material S1:** English Version of Oral Health Service Utilization Behavior Questionnaire

| Item  No. | Measrurement  Item | **Strongly Disagree** | **Disagree** | **Neutral** | **Agree** | **Strongly Agree** |
| --- | --- | --- | --- | --- | --- | --- |
| B1 | I proactively seek oral health knowledge |  |  |  |  |  |
| B2 | I schedule regular dental check-ups |  |  |  |  |  |
| B3 | I seek preventive/therapeutic dental services (e.g., scaling, fillings, extractions) |  |  |  |  |  |
| B4 | I visit dentists promptly for acute oral pain affecting daily life |  |  |  |  |  |
| PBE1 | ​I believe dental visits improve my dental health |  |  |  |  |  |
| PBE2 | I find dental care prevents masticatory dysfunction​ (dietary inconvenience due to oral diseases) |  |  |  |  |  |
| PBE3 | ​I expect dental treatments to reduce my future time and financial costs |  |  |  |  |  |
| PBA1 | ​I lack patience and perseverance for dental treatments |  |  |  |  |  |
| PBA2 | I fear pain during dental procedures |  |  |  |  |  |
| PBA3 | ​My financial constraints limit dental visits |  |  |  |  |  |
| PBA4 | ​My physical mobility limits dental service access |  |  |  |  |  |
| PBA5 | I experience insufficient social support for dental visits |  |  |  |  |  |
| PT1 | ​I perceive gingival bleeding as severe |  |  |  |  |  |
| PT2 | I consider tooth pain a serious problem |  |  |  |  |  |
| PT3 | ​I view tooth loss as highly detrimental |  |  |  |  |  |
| PT4 | ​I am concerned about gingival bleeding risks |  |  |  |  |  |
| PT5 | ​I worry about tooth pain occurrences |  |  |  |  |  |
| PT6 | I feel anxious about potential tooth loss |  |  |  |  |  |
| SN1 | ​My family expects me to seek timely dental visits​ (e.g., regular check-ups) |  |  |  |  |  |
| SN2 | My friends/relatives expect me to obtain timely dental care |  |  |  |  |  |
| SN3 | Health care providers expect me to receive regular dental services |  |  |  |  |  |
